# Supplementary material
Source: ML conference proceedings conference paper supplement (https://openaccess.thecvf.com/content/CVPR2024/html/Wu_Token_Transformation_Matters_CVPR_2024_paper.html)
Supplement: Supplementary file 1 [file Wu_Token_Transformation_Matters_CVPR_2024_supplemental.pdf]

## 1. More Visualization Results

Figure 1 illustrates the explanations produced by different methods. Compared to baseline methods, our TokenTM accurately localizes the rationales behind the model's prediction, resulting in more human-understandable interpretations.

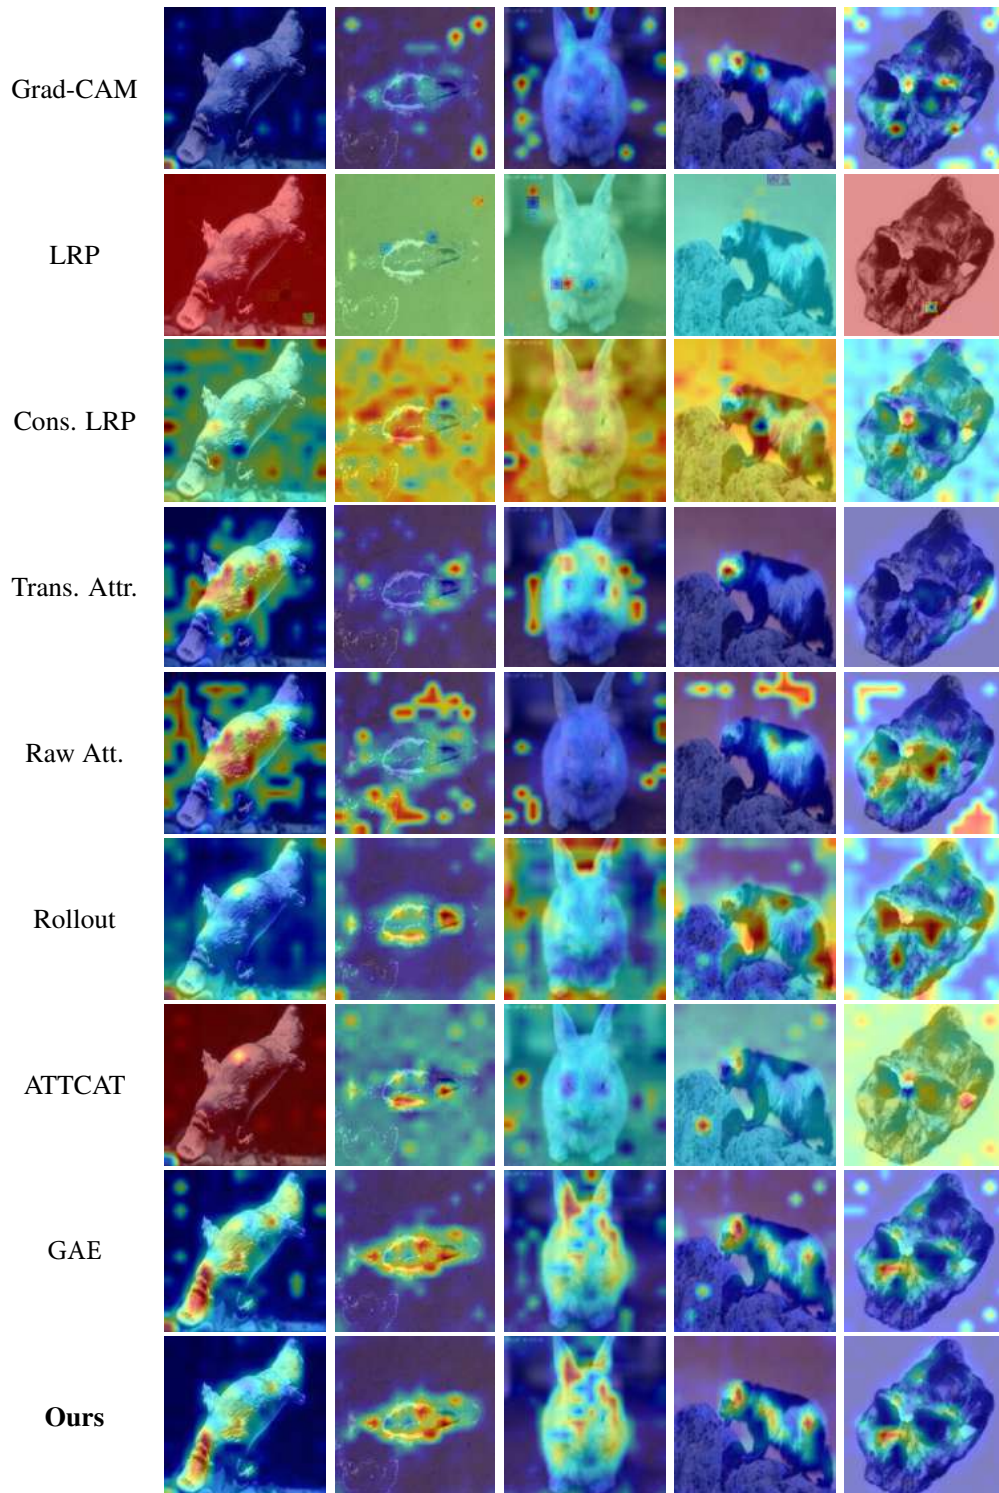

Figure 1. Visualizations of explanation results. Our method produces more object-centric heatmaps.

## 2. Detail of Experimental Setup

### 2.1. Datasets

**CIFAR-10 and CIFAR-100.** CIFAR-10 and CIFAR-100 [10] are two widely used image classification datasets, each containing 60,000  $32 \times 32$  color images. CIFAR-10 has 10 classes, while CIFAR-100 has a more challenging setting with 100 classes. Both datasets are split into 50,000 training and 10,000 testing images. In this paper, we evaluate explanation methods on the testing sets.

**ImageNet.** ImageNet [14] is a large-scale benchmark for image classification. In this work, we evaluate explanation methods on the validation set, which comprises 50,000 high-resolution images across 1,000 distinct classes. Each class contains roughly the same number of images, ensuring a balanced benchmark.

**ImageNet-Segmentation.** ImageNet-Segmentation [8] is a subset of ImageNet with segmentation annotations, containing 4,276 images from 445 categories.

### 2.2. Implementation of Baseline Methods

#### 2.2.1 Gradient-based Methods

**Grad-CAM.** Grad-CAM [15] considers the last attention map and utilizes the row corresponding to the  $[CLS]$  token, which is then mapped onto the 2D image space. Different from Raw Attention, Grad-CAM performs multi-head integration using the gradient. We implement this method on Vision Transformers following previous works [5, 6].

#### 2.2.2 Attribution-based Methods

**LRP.** LRP [4] starts from the model’s output and propagates relevance scores backward up to the input image. The propagation adheres to a set of rules defined by the Deep Taylor Decomposition theory [11].

**Conservative LRP.** Conservative LRP [2] introduces specialized LRP rules for attention heads and layer norms in Transformer models. This is designed to implement conservation, a desirable property of attribution-based techniques.

**Transformer Attribution.** Transformer Attribution [6] is an attribution-based method that is specifically designed for Transformer models. It first computes relevance scores via modified LRP and then integrates these scores with attention maps to produce an explanation.

#### 2.2.3 Attention-based Methods

**Raw Attention.** Raw Attention [9] extracts the multi-head attention map from the last layer of the model and reshapes the row corresponding to the  $[CLS]$  token into the 2D image space. The explanation result is further obtained by averaging across different heads.

**Rollout.** Rollout [1] interprets the information flow within Transformers from the perspective of Directed Acyclic Graphs (DAGs). It traces and accumulates the attention weights across various layers using a linear combination strategy.

**ATT-CAT.** ATT-CAT [13] is a Transformer explanation technique using attentive class activation tokens. It employs a combination of encoded features, their associated gradients, and their attention weights to produce confident explanations.

**GAE.** GAE [5] is a general interpretation framework applicable to diverse Transformer architectures. It aggregates attention maps with corresponding gradients to generate class-specific explanations.

### 2.3. Evaluation Metrics

**Area Under the Curve (AUC) ↓.** This metric calculates the Area Under the Curve (AUC) corresponding to the model’s performance as different proportions of input pixels are perturbed [3]. To elaborate, we first generate new data by gradually removing pixels in increments of 5% (from 0% to 100%) based on their explanation weights. The model’s accuracy is then assessed on these perturbed data, resulting in a sequence of accuracy measurements. The AUC is subsequently computed using this sequence.

**Area Over the Perturbation Curve (AOPC) ↑.** AOPC [7, 12] measures the changes in output probabilities *w.r.t.* the predicted label after perturbations:

$$\text{AOPC} = \frac{1}{|\mathbb{K}|} \sum_{k \in \mathbb{K}} (\hat{p}(y|\mathbf{x}) - \hat{p}(y|\mathbf{x}_k)), \quad (1)$$

where  $\mathbb{K} = \{0, 5, \dots, 95, 100\}$  is a set of perturbation levels,  $\hat{p}(y|\mathbf{x})$  estimates the probability for the predicted class given a sample  $\mathbf{x}$ , and  $\mathbf{x}_k$  is the perturbed version of  $\mathbf{x}$ , from which the top  $k\%$  pixels ranked by explanation weights are removed.

**Log-odds score (LOdds)**  $\downarrow$ . LOdds [13, 16] averages the difference between the negative logarithmic probabilities on the predicted label before and after masking  $k\%$  top-scored pixels over the perturbation set  $\mathbb{K}$ :

$$\text{LOdds} = -\frac{1}{|\mathbb{K}|} \sum_{k \in \mathbb{K}} \log \frac{\hat{p}(y|\mathbf{x})}{\hat{p}(y|\mathbf{x}_k)}. \quad (2)$$

The notations are the same as in Eq. (1).

## References

- [1] Samira Abnar and Willem Zuidema. Quantifying attention flow in transformers. In *ACL*, 2020. 2
- [2] Ameen Ali, Thomas Schnake, Oliver Eberle, Grégoire Montavon, Klaus-Robert Müller, and Lior Wolf. Xai for transformers: Better explanations through conservative propagation. In *ICML*, 2022. 2
- [3] Pepa Atanasova, Jakob Grue Simonsen, Christina Lioma, and Isabelle Augenstein. A diagnostic study of explainability techniques for text classification. In *EMNLP*, 2020. 2
- [4] Alexander Binder, Grégoire Montavon, Sebastian Lapuschkin, Klaus-Robert Müller, and Wojciech Samek. Layer-wise relevance propagation for neural networks with local renormalization layers. In *ICANN*, 2016. 2
- [5] Hila Chefer, Shir Gur, and Lior Wolf. Generic attention-model explainability for interpreting bi-modal and encoder-decoder transformers. In *ICCV*, 2021. 2
- [6] Hila Chefer, Shir Gur, and Lior Wolf. Transformer interpretability beyond attention visualization. In *CVPR*, 2021. 2
- [7] Hanjie Chen, Guangtao Zheng, and Yangfeng Ji. Generating hierarchical explanations on text classification via feature interaction detection. In *ACL*, 2020. 2
- [8] Matthieu Guillaumin, Daniel Küttel, and Vittorio Ferrari. Imagenet auto-annotation with segmentation propagation. *IJCV*, 110: 328–348, 2014. 2
- [9] Sarthak Jain and Byron C Wallace. Attention is not explanation. In *NAACL*, 2019. 2
- [10] Alex Krizhevsky, Geoffrey Hinton, et al. Learning multiple layers of features from tiny images. 2009. 2
- [11] Grégoire Montavon, Sebastian Lapuschkin, Alexander Binder, Wojciech Samek, and Klaus-Robert Müller. Explaining nonlinear classification decisions with deep taylor decomposition. *PR*, 65:211–222, 2017. 2
- [12] Dong Nguyen. Comparing automatic and human evaluation of local explanations for text classification. In *NAACL*, 2018. 2
- [13] Yao Qiang, Deng Pan, Chengyin Li, Xin Li, Rhongho Jang, and Dongxiao Zhu. Attcat: Explaining transformers via attentive class activation tokens. In *NeurIPS*, 2022. 2, 3
- [14] Olga Russakovsky, Jia Deng, Hao Su, Jonathan Krause, Sanjeev Satheesh, Sean Ma, Zhiheng Huang, Andrej Karpathy, Aditya Khosla, Michael Bernstein, et al. Imagenet large scale visual recognition challenge. *IJCV*, 115:211–252, 2015. 2
- [15] Ramprasaath R Selvaraju, Michael Cogswell, Abhishek Das, Ramakrishna Vedantam, Devi Parikh, and Dhruv Batra. Grad-cam: Visual explanations from deep networks via gradient-based localization. In *ICCV*, 2017. 2
- [16] Avanti Shrikumar, Peyton Greenside, and Anshul Kundaje. Learning important features through propagating activation differences. In *ICML*, 2017. 3
